# Supplementary material
Source: PubMed Central journal article supplement (PMC10026577)
Supplement: boe-14-3-1192-s001.pdf [file boe-14-3-1192-s001.pdf]

## Monitoring mouse brain perfusion with hybrid magnetic resonance optoacoustic tomography: supplement

WUWEI REN,<sup>1,2,3,6</sup>  XOSÉ LUÍS DEÁN-BEN,<sup>1,2,6</sup> ZHIVA SKACHOKOVA,<sup>1</sup> MARK-AUREL AUGATH,<sup>1,2</sup> RUIQING NI,<sup>1,4,5</sup>  ZHENYUE CHEN,<sup>1,2</sup>  AND DANIEL RAZANSKY<sup>1,2,4,\*</sup> 

<sup>1</sup>*Institute for Biomedical Engineering and Institute of Pharmacology and Toxicology, Faculty of Medicine, University of Zurich, Zurich 8052, Switzerland*

<sup>2</sup>*Institute for Biomedical Engineering, Department of Information Technology and Electrical Engineering, ETH Zurich, Zurich 8093, Switzerland*

<sup>3</sup>*Present address: School of Information Science and Technology, ShanghaiTech University, Shanghai 201210, China*

<sup>4</sup>*Zurich Neuroscience Center, University of Zurich and ETH Zurich, Zurich 8093, Switzerland*

<sup>5</sup>*Institute for Regenerative Medicine, Faculty of Medicine, University of Zurich, Zurich 8952, Switzerland*

<sup>6</sup>*equal contribution*

\*[daniel.razansky@uzh.ch](mailto:daniel.razansky@uzh.ch)

---

This supplement published with Optica Publishing Group on 17 February 2023 by The Authors under the terms of the [Creative Commons Attribution 4.0 License](https://creativecommons.org/licenses/by/4.0/) in the format provided by the authors and unedited. Further distribution of this work must maintain attribution to the author(s) and the published article's title, journal citation, and DOI.

Supplement DOI: <https://doi.org/10.6084/m9.figshare.21865431>

Parent Article DOI: <https://doi.org/10.1364/BOE.482205>

# Supplementary Materials for

## Monitoring mouse brain perfusion with hybrid magnetic resonance optoacoustic tomography

Wuwei Ren, Xosé Luís Deán-Ben, Zhiva Skachokova, Mark-Aurel Augath, Ruiqing Ni,  
Zhenyue Chen, Daniel Razansky\*

\*Corresponding author. Email: daniel.razansky@uzh.ch

### Additional description of MROT system

The MROT system is designed as an insert that operates compatibly in a high-field preclinical MRI scanner. The MROT insert is consisted of a spherical matrix array transducer and an animal support. Fig. S1 shows the experimental setup of MROT and its detailed dimensions. The animal support has three 3D-printed components: two bases in the back and front and a bridging cradle. The bridging cradle is used to support the mouse and features a ‘Ω’-shaped groove in which a long tubing filled with warming water can be placed (Fig. S1A). The cradle is connected with both bases using plastic screws, whilst its height is adjustable to guarantee an optimized field-of-view for OAT detection (Fig. S1C).

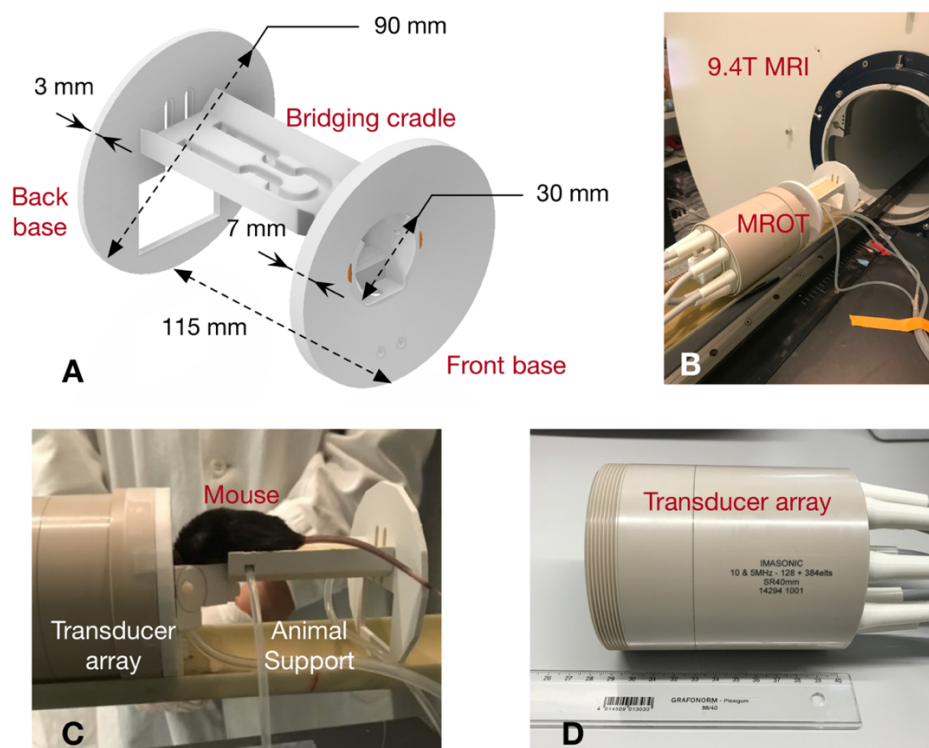

**Fig. S1. Experimental setup of MROT.** (A) The animal support has three components: a back base, a front base, and a bridging cradle. The detailed dimensions of the support are indicated. (B) MROT insert operates in a 9.4T high-field MRI scanner. (C) Positioning of the mouse during MROT data acquisition. (D) A side-view of the transducer array.

**In vivo hybrid MROT imaging of contrast agent perfusion dynamics**

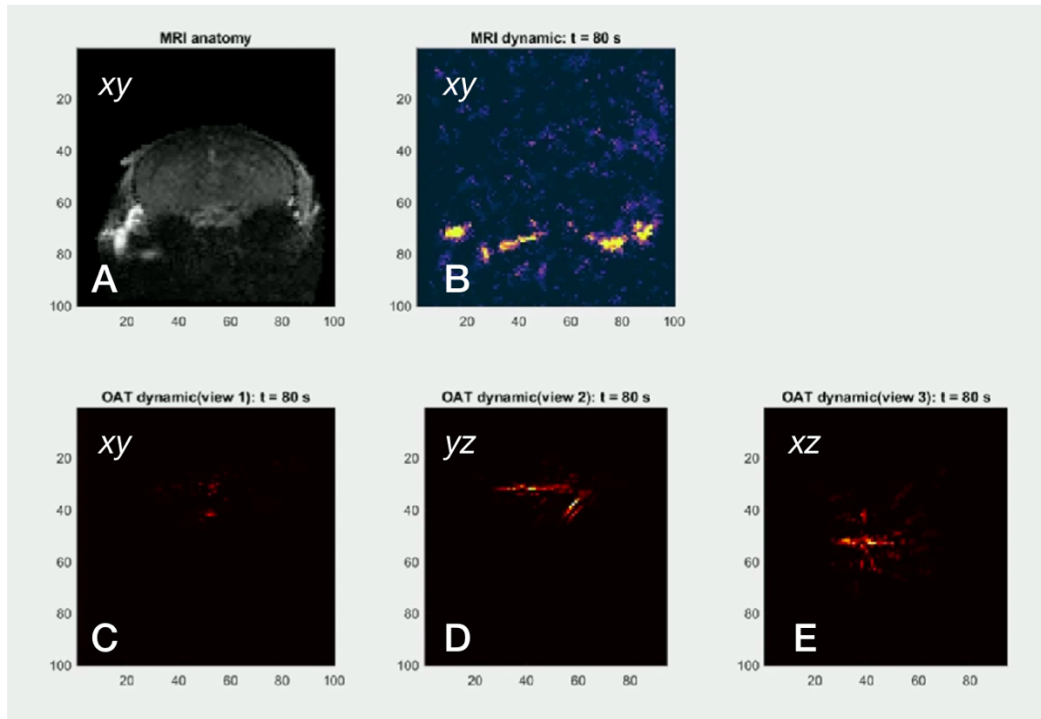

**Fig. S2. Hybrid MROT imaging of contrast agent perfusion in a mouse brain.** The first row visualizes the xy-plane images of T1-weighted MRI (A) and ToF MRI (B) emphasizing the anatomical information and the concentration variation of GdDOTA. The second row shows ICG-enhanced volumetric OAT images in xy-, yz-, and xz- planes, respectively (C-E). (see **Visualization 1**)

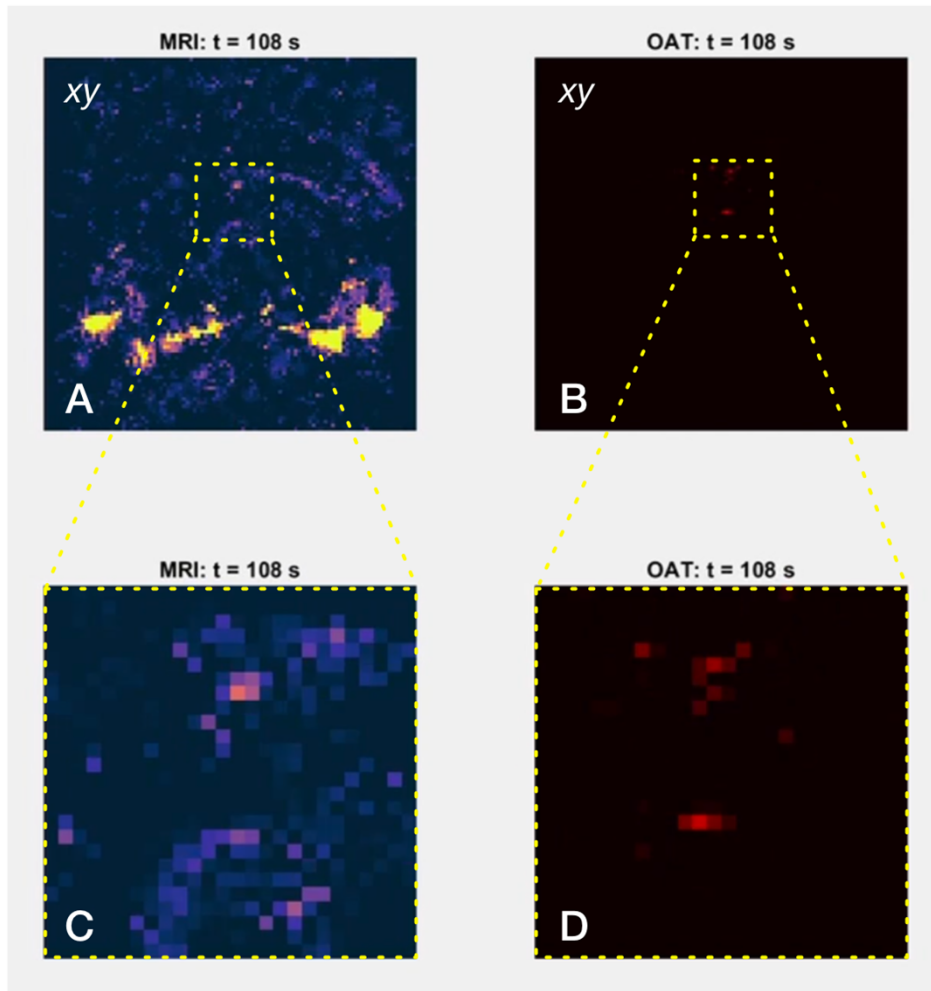

**Fig. S3. Simultaneous recording of brain perfusion using ToF MRI and OAT.** (A) Dynamic ToF MRI image showing the distribution variation of GdDOTA. (B) Dynamic OAT image showing the distribution variation of ICG. (C) and (D) are the enlarged sections of (A) and (B). (see **Visualization 2**)
